# Supplementary material for: Preparation of succinic anhydride-functionalized glucose-based carbon microspheres for selective adsorption of cationic dyes
Source: Royal Society of Chemistry journal article supplement (doi:10.1039/d5nj03774c), 2026-01-01
Supplement: d5nj03774c1.pdf [file d5nj03774c1.pdf]

## **Supporting Information**

### **Preparation and Selective Adsorption of Cationic Dyes with Succinic**

#### **Anhydride-Functionalized Glucose-Based Carbon Microspheres**

Weiyu Liu<sup>a</sup>, Mengxin Liu<sup>a</sup>, Mei Qin<sup>a</sup>, Wenhui Rao<sup>a</sup>, Yijun Xie<sup>b</sup> and Chuanbai Yu<sup>a,\*</sup>

<sup>a</sup> College of Materials Science and Engineering, Guilin University of Technology (GUT), Guilin 541004, China.

<sup>b</sup> Institute of Nanochemistry and Nanobiology, School of Environmental and Chemical Engineering, Shanghai University, Shanghai 200444, China

\*Corresponding authors. Email addresses: ycb2008@glut.edu.cn (Chuanbai Yu)

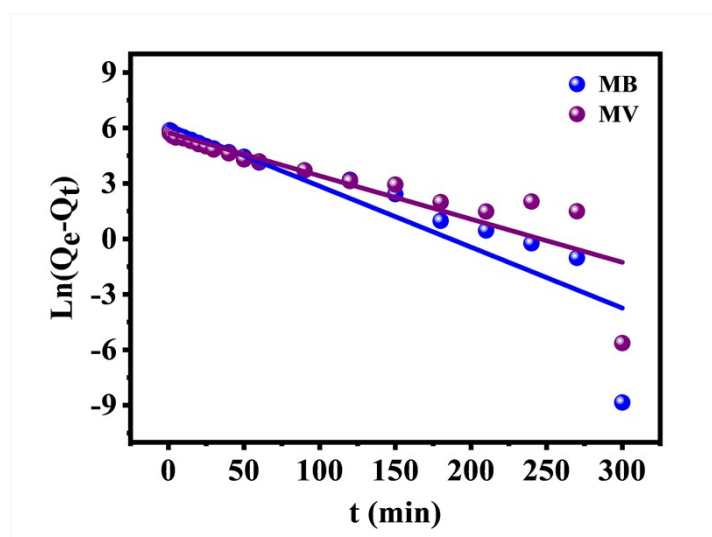

**Fig. S1.** Kinetic fitting results of pseudo-first-order models of MB and MV by SA-CMS.

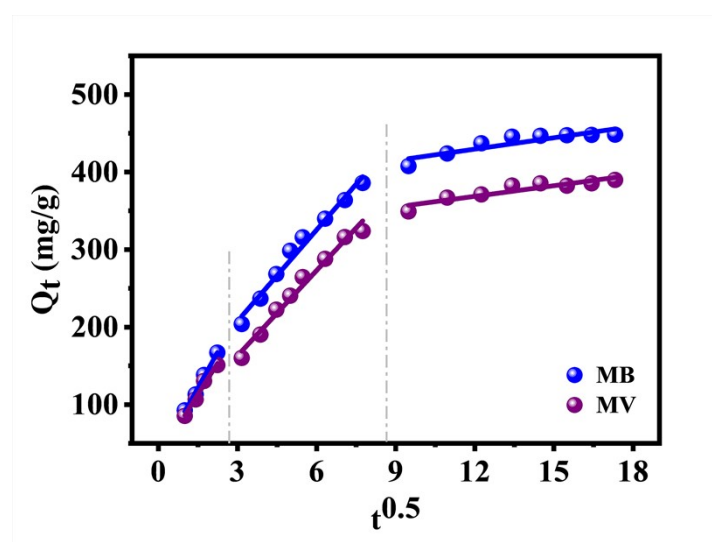

**Fig. S2.** Fitting result of the intraparticle diffusion model of MB and MV by SA-CMS.

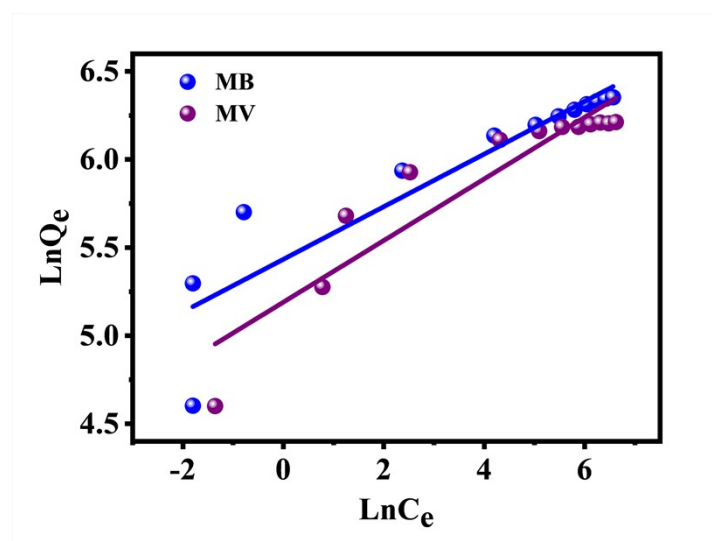

**Fig. S3.** Isotherm fitting results of Freundlich isotherm models of MB and MV by

SA-CMS.

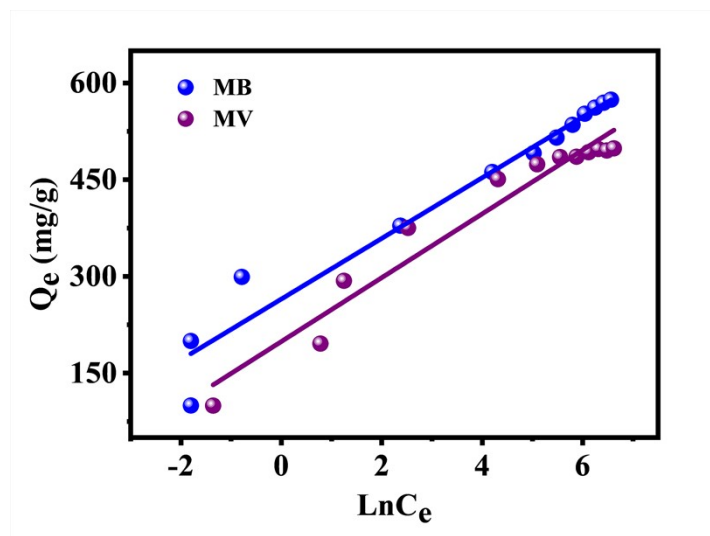

Fig. S4. Isotherm fitting results of Temkin isotherm models of MB and MV by SA-CMS.

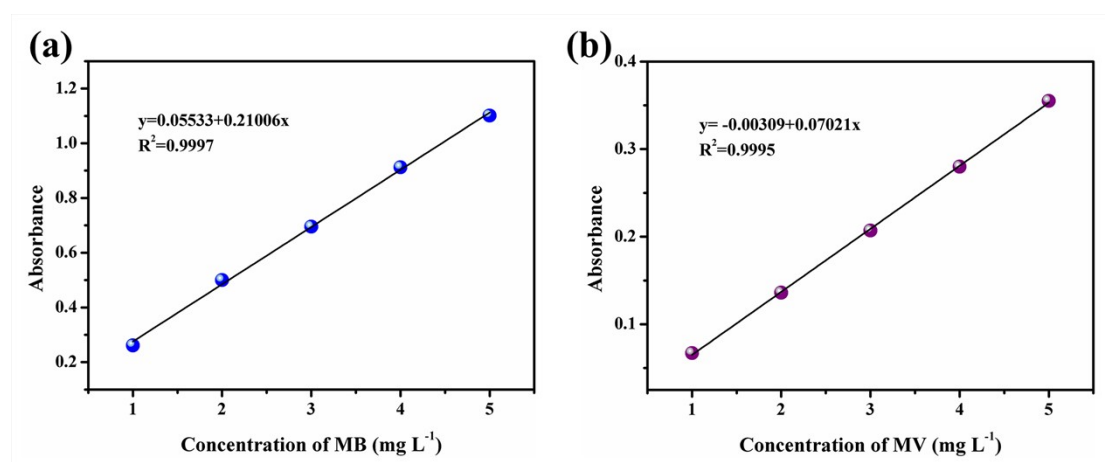

Fig. S5. Standard curve of (a) MB and (b) MV.

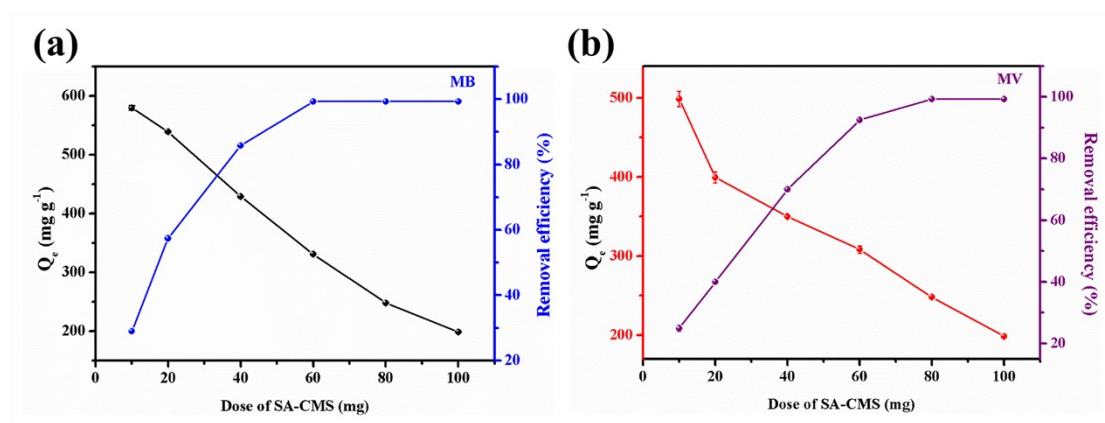

Fig. S6. Comparison of adsorption properties of SA-CMS with different adsorption materials for (a) MB and (b) MV.

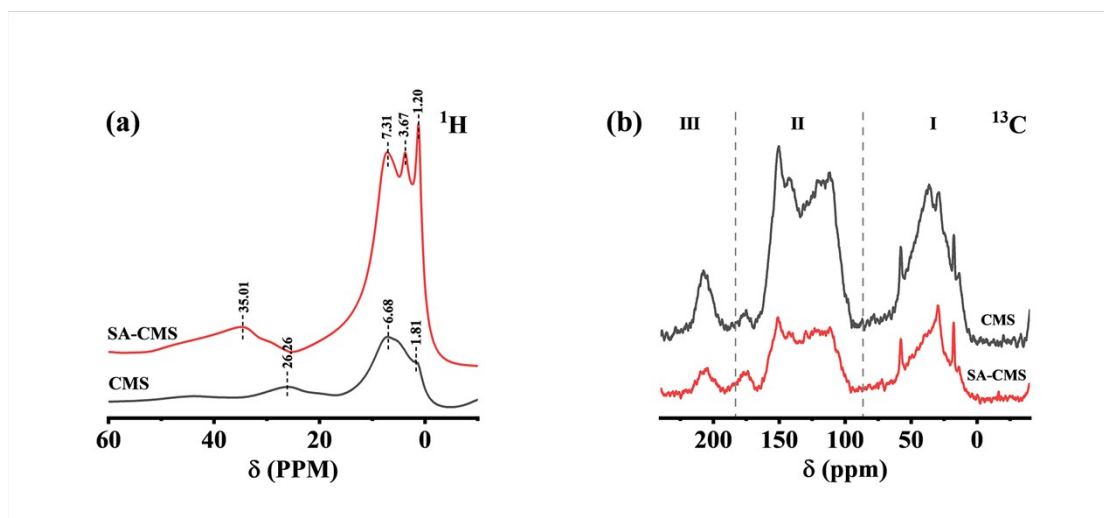

**Fig. S7.** ssNMR spectra of CMS and SA-CMS: (a)  $^1\text{H}$  NMR spectra, (b)  $^{13}\text{C}$  NMR spectra.

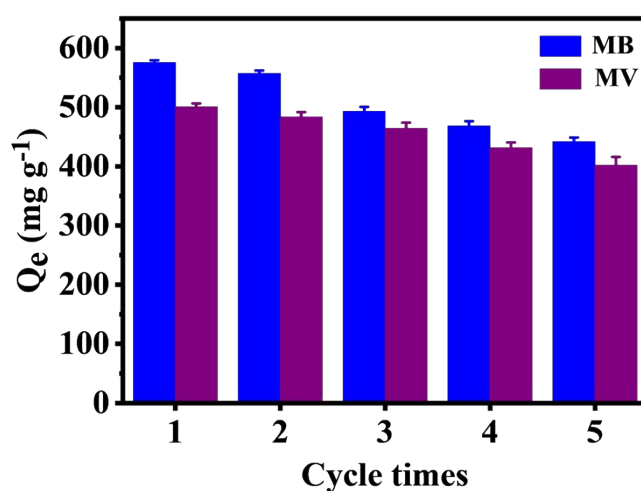

**Fig. S8.** Adsorption capacities of the SA-CMS in five adsorption-desorption cycles (Desorption in 2M HCl for 4 h).

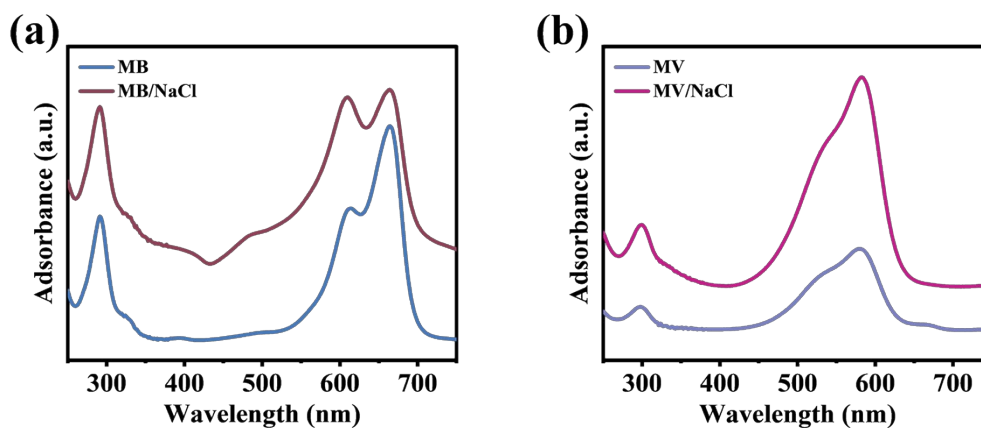

**Fig. S9.** (a) Comparison of UV-vis before and after adding NaCl to MB, (b)

**Comparison of UV-vis before and after adding NaCl to MV.**
